# Supplementary material
Source: publisher figshare collection journal article supplement (https://geolsoc.figshare.com/ndownloader/files/28068023)
Supplement: Supplementary file 1 [file 28068023]

## Sheet: SI Table 4
Sample	Depth (mbs)	OPT 1 AGE	OPT 2 AGE	d13C T. amp whole-sparite infill	d18O T. amp whole-sparite infill	d13C T. amp 'empty'	d18O T. amp 'empty'	d13C T. amp crushed fragments	d18O T. amp crushed fragments	d13C T. amp sparite infill	d18O T. amp sparite infill	d13C Cibs. spp.	d18O Cibs. spp.
NKK1-30a, 34-43	40.89	31.7563	32.9974	-0.314271	-4.1417	0.60515	-3.38042	0.922212	-2.94952			-0.116766	0.516458
NKK-1/30b, 89-96	41.425	31.8168	33.0371					0.561395	-2.97575			-0.211148	0.285247
NKK-1/30, 96-100	41.51	31.8263	33.0433					0.646562	-2.60761
NKK-1/31, 69-77	43.23	32.0189	33.1696					0.841595	-3.19914			0.692032	1.51323
NKK-1/32a, 36-46	43.91	32.2528	33.2196					1.20902	-2.90777
NKK-1-32b, 112-120	44.66	32.5134	33.2746			0.962151	-3.26891					0.461073	0.628191
NKK-1/33, 33-43	45.375	32.7619	33.3271					1.39799	-3.06551			-0.524794	3.00207
NKK1-33b, 95-105	46	32.9429	33.373	1.37949	-3.32764	1.19328	-3.19364					0.612894	0.964873
NKK-1/34, 19-25	46.74	33.0424	33.4274					1.13838	-3.32191			-2.35236	-0.243052
NKK-1/34, 105-115	47.6	33.1581	33.4905					0.0907846	-3.68404
NKK-1/35, 25-35	48.3	33.2523	33.5419							-3.86654	-7.43861	0.557873	1.16077
NKK1-35, 80-90	48.85	33.3263	33.5823					0.0627779	-3.95725			-0.232078	-0.354256
NKK-1/36, 45-54	49.995	33.4803	33.6664					-4.87936	-8.5326			-2.09979	-3.44385
NKK-1/36, 81-90	50.36	33.5288	33.6928					-3.34072	-7.41137	-5.69823	-10.3041	1.02594	1.59544
NKK-1-37, 33-43	51.13	33.633	33.7497			-1.05139	-4.54801					-0.545476	-1.09239
NKK-1-38, 16-24	51.7	33.71	33.7916	-3.23339	-6.99315			-0.546681	-5.65673			-1.2615	-2.14091
NKK-1/38, 24-36	51.8	33.7232	33.7989					-3.91541	-8.26096			-1.85609	-3.02483
NKK-1-38, 92-101	52.465	33.8126	33.8478					-1.41756	-6.48747			-0.6533	-1.91836
NKK-1/39, 40-50	53.45	33.9201	33.9201					-1.18334	-4.53696
NKK1-39, 50-61	53.555	33.9278	33.9278			0.00758345	-3.57926					-1.32288	-1.57672
NKK-1/40, 50-60	54.55	34.0009	34.0009					0.858245	-3.67004			-0.216344	0.199141
NKK-1/41, 60-70	55.65	34.0817	34.0817					-1.38592	-4.51661			-1.75482	-0.897683
NKK-1-42, 62-71	56.665	34.1562	34.1562					0.119436	-3.93608	-3.16184	-4.76222	-1.2211	-1.08607
NKK-1/43, 42-52	57.465	34.2153	34.2153					-1.28387	-4.12961			-1.44688	-1.33985
NKK-1-43, 100-109	58.045	34.2575	34.2575					-0.178199	-3.95526			-0.420088	-0.735944
NKK-1/44, 40-50	58.45	34.2873	34.2873					-1.29081	-4.90764
NKK-1-45, 49-59	60.04	34.404	34.404					0.0283277	-4.64767	-2.0859	-5.47747	-0.32234	-0.887119
NKK-1/46b, 100-110	61.55	34.5068	34.5068
NKK-1-47, 45-55	62.5	34.5691	34.5691	-0.725617	-4.58021			0.624609	-4.02225	-1.378	-5.06486	-1.69844	-1.21206
NKK-1/47, 90-100	62.95	34.5985	34.5985					-0.27341	-4.49935
NKK-1/48, 98-108	65.03	34.7348	34.7348					-0.0602738	-4.30241
NKK-1-49, 44-57	66.005	34.7987	34.7987					-1.32907	-7.62639			0.0528882	-0.0992901
